# Supplementary material
Source: PubMed Central journal article supplement (PMC3164276)
Supplement: supp_111.040055_Supplemental_Data_40055.pdf [file supp_111.040055_Supplemental_Data_40055.pdf]

**Ocular Pharmacokinetics of Dorzolamide and Brinzolamide Following Single and Multiple Topical Dosing: Implications for Effects on Ocular Blood Flow**

Rajendra S. Kadam, Gajanan Jadhav, Miller Ogidigben, and Uday B. Kompella.

Department of Pharmaceutical Sciences (R.S.K., G.J., and U.B.K.)

Departments of Ophthalmology and Bioengineering (U.B.K.)

University of Colorado Anschutz Medical Campus, Aurora, CO 80045

Merck & Co., Inc. (M.O.)

**Drug Metabolism and Disposition**

**FIGURE LEGENDS**

**Supplemental Figure 1.** Representative chromatogram of analytes in rabbit cornea.

Dorzolamide and brinzolamide were at 2500 ng/ml and timolol was at 500 ng/ml.

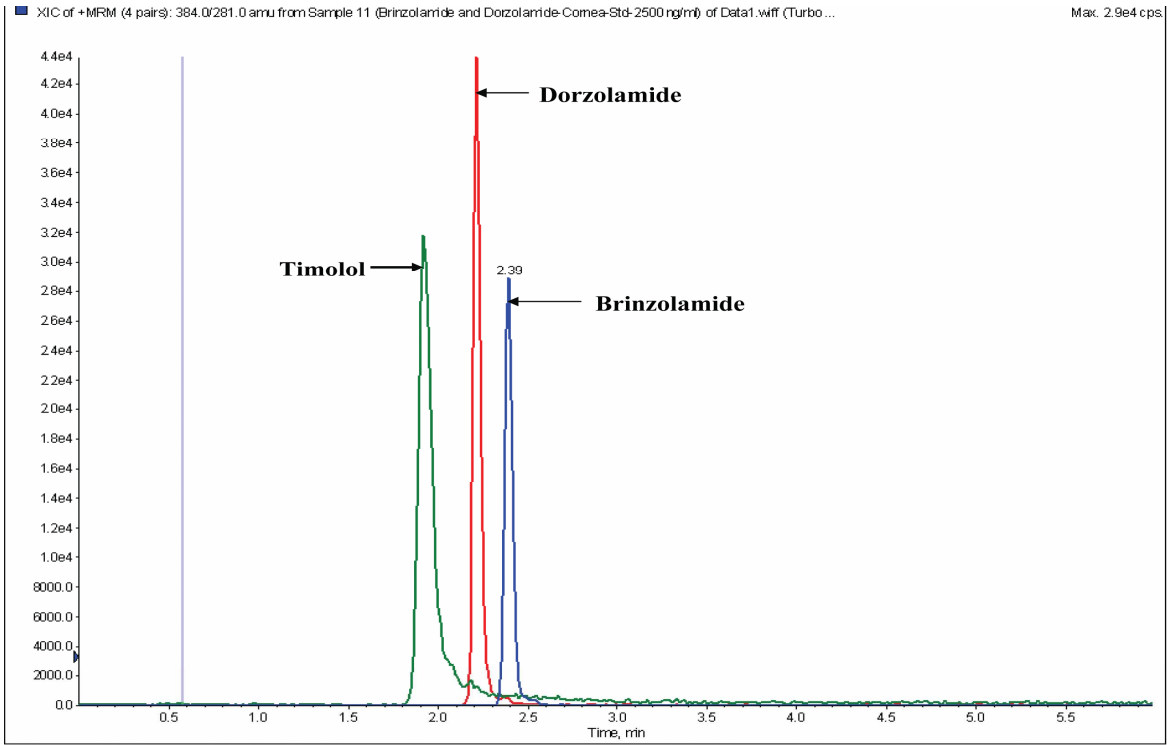

Supplemental Figure 1
